# Supplementary material for: Low-cost & low-temperature curable solution-processed silica-based nanostructured antireflective coatings on CuIn1−xGaxSe2thin film solar cells
Source: Royal Society of Chemistry journal article supplement (doi:10.1039/c4ra15602a), 2015-01-01
Supplement: c4ra15602a1.pdf [file c4ra15602a1.pdf]

## Supplementary Information

### Low-Cost & Low-Temperature Curable Solution-Processed Silica-based Nanostructured Antireflection Coatings on $\text{CuIn}_{1-x}\text{Ga}_x\text{Se}_2$ Thin Film Solar Cells

Seung-Yeol Han<sup>a,b,c</sup>, Changqing Pan<sup>a,b</sup>, Dae-Hwan Kim<sup>a,b,d</sup>, Chih-hung Chang<sup>a,b,c\*</sup>

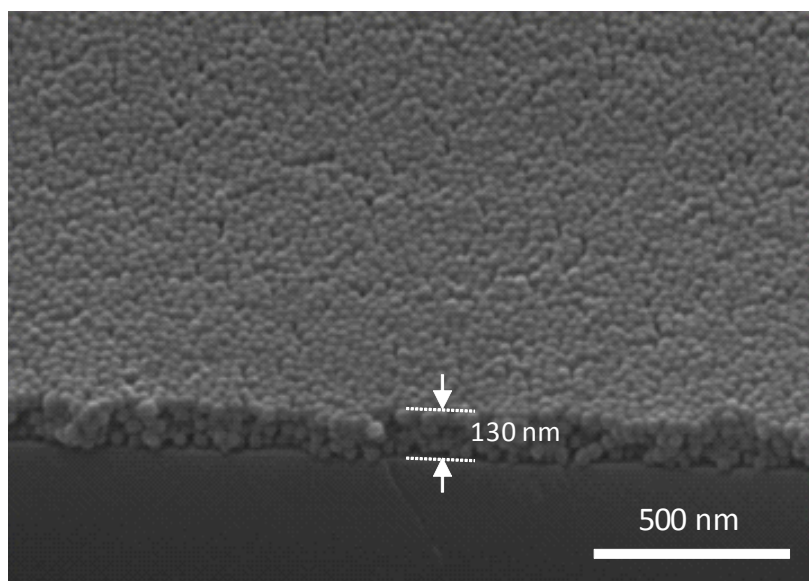

Figure S1. Cross-sectional SEM image of optimized ARC layer

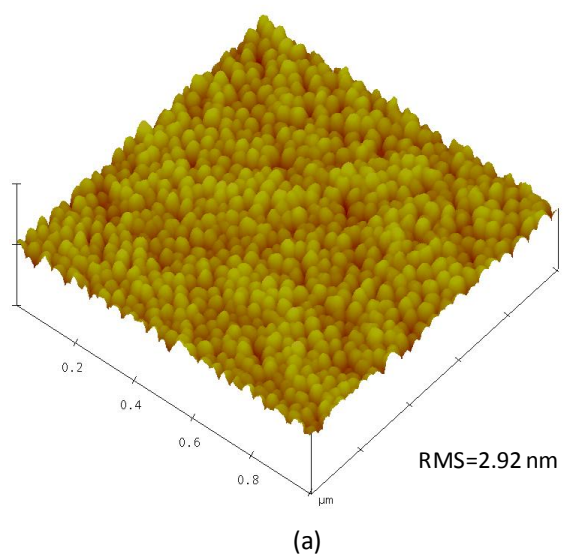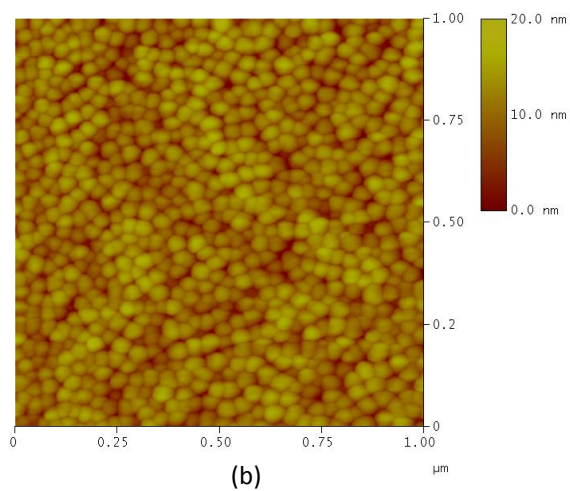

Figure S2. AFM images of (a) tilted top-view and (b) roughness profile on porous silica nanostructured ARC layer.

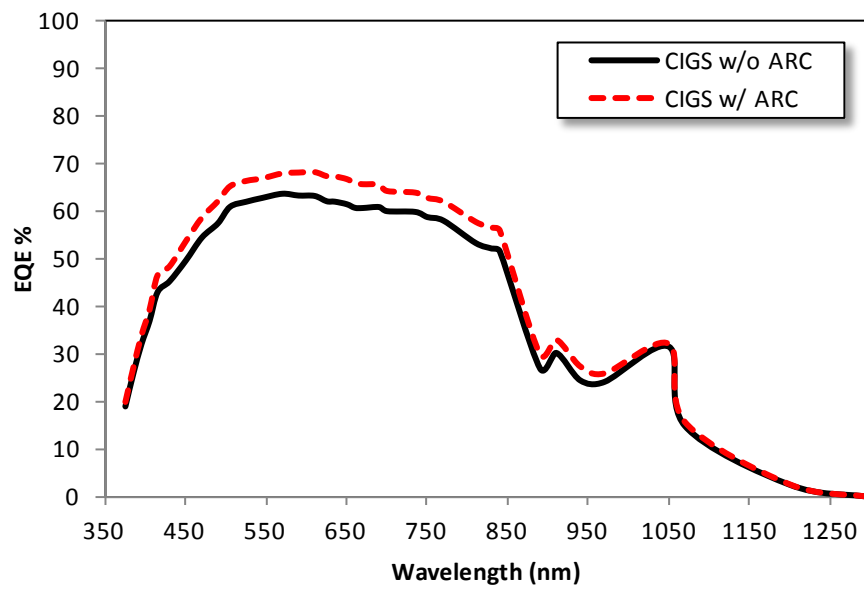

Figure S3. External quantum efficiency (EQE) data of CIGS solar cells with/without ARC
